# Supplementary material for: Facile preparation of hierarchical Nb2O5 microspheres with photocatalytic activities and electrochemical properties
Source: Royal Society of Chemistry journal article supplement (doi:10.1039/c4ta01567c), 2014-01-01
Supplement: c4ta01567c1.pdf [file c4ta01567c1.pdf]

### Supporting Information

## **Facile preparation of hierarchical Nb<sub>2</sub>O<sub>5</sub> microspheres with photocatalytic activities and electrochemical properties**

Sheng-qi Guo,<sup>†</sup> Xiao Zhang,<sup>†</sup> Zhen Zhou,<sup>\*,‡</sup> Guan-dao Gao,<sup>\*,†</sup> Lu Liu<sup>\*,†</sup>

<sup>†</sup> *Tianjin Key Laboratory of Environmental Remediation and Pollution Control, Nankai University, Tianjin 300071, China.*

<sup>‡</sup> *Institute of New Energy Material Chemistry, Key Laboratory of Advanced Energy Materials Chemistry (Ministry of Education), Nankai University, Tianjin, 300071, China.*

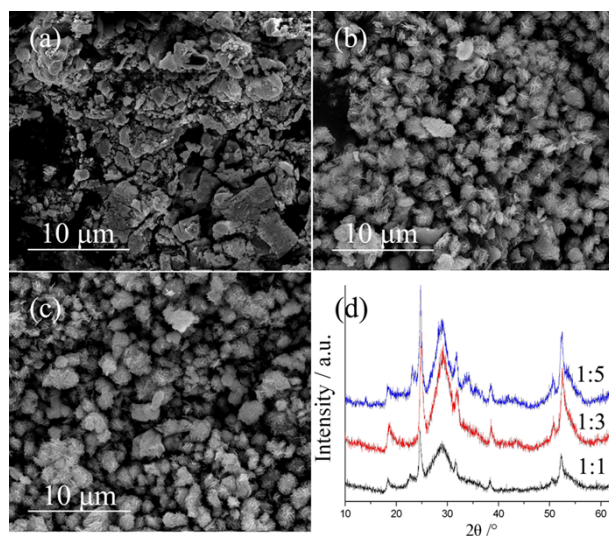

**Figure S1.** SEM images of samples synthesized with different molar ratio of Nb<sub>2</sub>O<sub>5</sub> to Hexamethylenetetramine: (a) 1:1, (b) 1:3, (c) 1:5 and (d) XRD patterns of the as-prepared Nb<sub>2</sub>O<sub>5</sub> products.

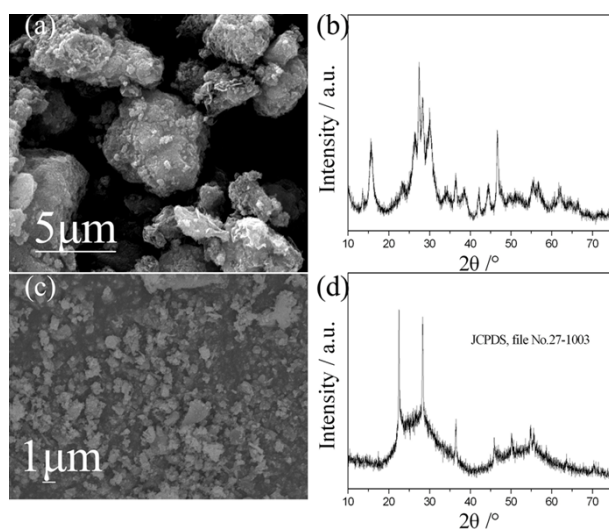

**Figure S2.** SEM images and XRD of samples synthesized by NaOH as alkaline sources (a) and (b); SEM images and XRD of samples synthesized by  $\text{Na}_2\text{CO}_3$  as alkaline sources (c) and (d).

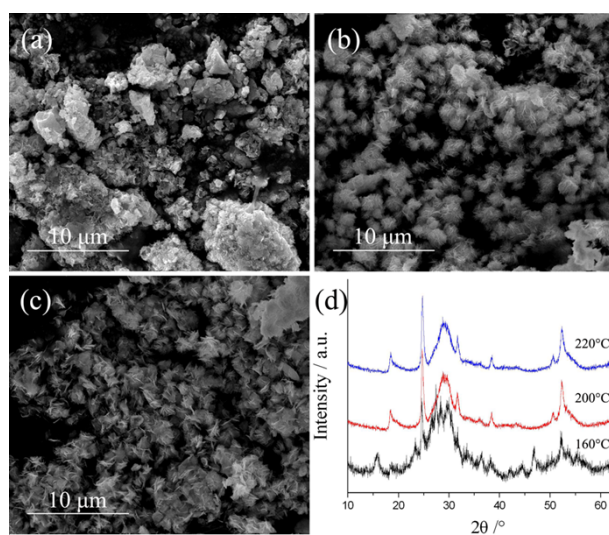

**Figure S3.** SEM images of the samples synthesized for (a) 160°C, (b) 200°C, (c) 220°C, and (d) XRD patterns of the as-prepared  $\text{Nb}_2\text{O}_5$  products.

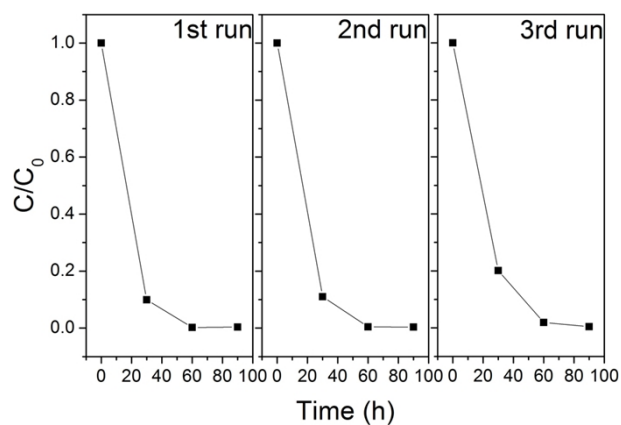

**Figure S4.** Cycling runs in the photocatalytic degradation of RhB by as-prepared  $\text{Nb}_2\text{O}_5$  products

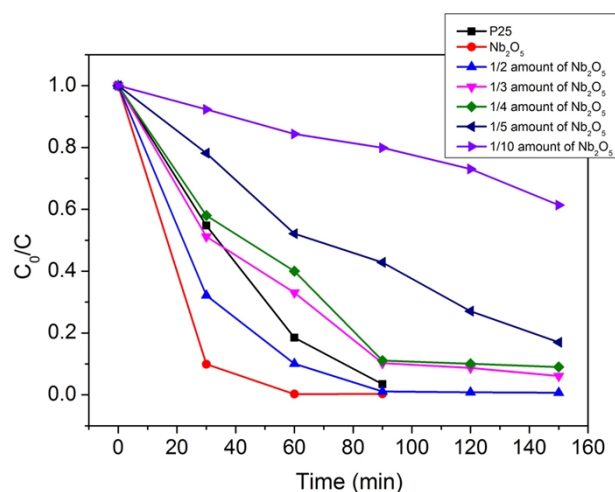

**Figure S5.** The photodegradation efficiencies of RhB as a function of irradiation time in different catalysts.”

| Element                                                                                                                                                                                                                                    | Value      |
|--------------------------------------------------------------------------------------------------------------------------------------------------------------------------------------------------------------------------------------------|------------|
| Rs                                                                                                                                                                                                                                         | 3.641      |
| CPE1-T                                                                                                                                                                                                                                     | 2.6052E-05 |
| CPE1-P                                                                                                                                                                                                                                     | 0.77544    |
| Rct                                                                                                                                                                                                                                        | 197.2      |
| Wo-R                                                                                                                                                                                                                                       | 142.6      |
| Wo-T                                                                                                                                                                                                                                       | 16.71      |
| Wo-P                                                                                                                                                                                                                                       | 0.17841    |
| Chi-Squared: 0.00040429<br>Weighted Sum of Squares: 0.0084901<br>Mode: Run Fitting / Freq. Range (0.001 - 1000000)<br>Maximum Iterations: 100<br>Optimization Iterations: 0<br>Type of Fitting: Complex<br>Type of Weighting: Calc-Modulus |            |

**Table S1.** Simulated EIS Resistance and Capacitance Values.
